# Supplementary material for: Exogenous Salicylic Acid Enhanced Resistance of Foxtail Millet (Setaria italica) to Sclerospora graminicola
Source: Research Square preprint supplement (doi:10.21203/rs.3.rs-1608536/v1), 2022-05-19
Supplement: Supplementary file 1 [file 58a833fe3d90a5d471f5e159.docx]

Supplemental Table 3 Effect of SA treatment on foxtail millet seeding growth

| Variety | SA Concentration (mM) | Plant height  (cm) | Fresh weight (g) | Dry weight  (g) |
| --- | --- | --- | --- | --- |
| GBS | 0 | 3.97±0.404  ab | 0.1083±0.011  c | 0.0129±0.001 bc |
|  | 1 | 4.23±0.416  a | 0.1103±0.025  bc | 0.0106±0.002 cd |
|  | 3 | 3.53±0.416  bc | 0.0871±0.017  c | 0.0106±0.002 cd |
|  | 6 | 2.17±0.416  d | 0.0404±0.004 de | 0.0068±0.001  e |
|  | 9 | 2.10±0.200  d | 0.0266±0.003  e | 0.0079±0.001 de |
| JG21 | 0 | 3.97±0.503  ab | 0.1622±0.016  a | 0.0193±0.001  a |
|  | 1 | 3.00±0.100  c | 0.1370±0.016 ab | 0.0150±0.001  b |
|  | 3 | 3.13±0.551  c | 0.1055±0.025  c | 0.0128±0.002 bc |
|  | 6 | 2.33±0.252  d | 0.0588±0.010  d | 0.0106±0.001 cd |
|  | 9 | 1.90±0.001  d | 0.0438±0.017 de | 0.0099±0.001  d |

Note: Data was shown as the mean ± SD. Different lowercase letters in the same column indicate significant differences among different concentrations (*P* < 0.05, ANOVA, n=6).
